# Supplementary material for: Real world heart failure epidemiology and outcome: A population-based analysis of 88,195 patients
Source: PubMed Central journal article supplement (PMC5325273; doi:10.1371/journal.pone.0172745), 2017-02-24
Supplement: pone.0172745.s002.pdf [file pone.0172745.s002.pdf]

**S2 File. Clinical Classifications Software (CCS).** The CCS is a diagnosis categorization scheme based on the ICD-9-CM that aggregates all diagnosis codes into 262 mutually exclusive, clinically homogeneous categories.

**Ischemic heart disease**

|        |                                                          |
|--------|----------------------------------------------------------|
| 410.xx | Acute myocardial infarction                              |
| 411.xx | Other acute and subacute forms of ischemic heart disease |
| 412    | Old myocardial infarction                                |
| 413.xx | Angina pectoris                                          |
| 414.xx | Coronary atherosclerosis                                 |
| 996.03 | Mechanical complication due to coronary bypass graft     |
| V45.81 | Aortocoronary bypass status                              |
| V45.82 | Percutaneous transluminal coronary angioplasty status    |

**Atrial fibrillation**

|        |                     |
|--------|---------------------|
| 427.31 | Atrial fibrillation |
| 427.32 | Atrial flutter      |

**Diabetes mellitus**

|        |                   |
|--------|-------------------|
| 250.xx | Diabetes mellitus |
|--------|-------------------|

**Anemia**

|        |                             |
|--------|-----------------------------|
| 280.xx | Iron deficiency anemia      |
| 281.xx | Other deficiency anemia     |
| 282.xx | Hereditary hemolytic anemia |
| 283.xx | Acquired hemolytic anemia   |
| 284.xx | Aplastic anemia             |
| 285.xx | Other Anemia                |

**COPD**

|        |                                                      |
|--------|------------------------------------------------------|
| 491.2x | Obstructive chronic bronchitis                       |
| 491.8  | Other chronic bronchitis                             |
| 491.9  | Unspecified chronic bronchitis                       |
| 492.x  | Emphysema                                            |
| 493.2x | Chronic obstructive asthma                           |
| 494.x  | Bronchiectasis                                       |
| 496    | Chronic airway obstruction, not elsewhere classified |

**Valve heart disease**

|       |                 |
|-------|-----------------|
| 394.x | Mitral stenosis |
|-------|-----------------|

|        |                                                 |
|--------|-------------------------------------------------|
| 395.x  | Rheumatic aortic stenosis                       |
| 396.x  | Mitral valve stenosis and aortic valve stenosis |
| 397.x  | Diseases of tricuspid valve                     |
| 424.xx | Valve and endocardium disorders                 |
| 7852   | Undiagnosed cardiac murmurs                     |
| 7853   | Other abnormal heart sounds                     |
| V422   | Heart valve replaced by transplant              |
| V433   | Heart valve replaced by other means             |

### Chronic kidney disease

|        |                                                                                                                                                      |
|--------|------------------------------------------------------------------------------------------------------------------------------------------------------|
| 40301  | Hypertensive chronic kidney disease, malignant, with chronic kidney disease stage V or end stage renal disease                                       |
| 40311  | Hypertensive chronic kidney disease, benign, with chronic kidney disease stage V or end stage renal disease                                          |
| 40391  | Hypertensive chronic kidney disease, unspecified, with chronic kidney disease stage V or end stage renal disease                                     |
| 40402  | Hypertensive heart and chronic kidney disease, malignant, without heart failure and with chronic kidney disease stage V or end stage renal disease   |
| 40403  | Hypertensive heart and chronic kidney disease, malignant, with heart failure and with chronic kidney disease stage V or end stage renal disease      |
| 40412  | Hypertensive heart and chronic kidney disease, benign, without heart failure and with chronic kidney disease stage V or end stage renal disease      |
| 40413  | Hypertensive heart and chronic kidney disease, benign, with heart failure and chronic kidney disease stage V or end stage renal disease              |
| 40492  | Hypertensive heart and chronic kidney disease, unspecified, without heart failure and with chronic kidney disease stage V or end stage renal disease |
| 40493  | Hypertensive heart and chronic kidney disease, unspecified, with heart failure and chronic kidney disease stage V or end stage renal disease         |
| 45821  | Hypotension of hemodialysis                                                                                                                          |
| 582.xx | Chronic glomerulonephritis                                                                                                                           |
| 5830   | Nephritis and nephropathy, not specified as acute or chronic, with lesion of proliferative glomerulonephritis                                        |
| 5831   | Nephritis and nephropathy, not specified as acute or chronic, with lesion of membranous glomerulonephritis                                           |
| 5832   | Nephritis and nephropathy, not specified as acute or chronic, with lesion of membranoproliferative glomerulonephritis                                |
| 5834   | Nephritis and nephropathy, not specified as acute or chronic, with lesion of rapidly progressive glomerulonephritis                                  |
| 5836   | Nephritis and nephropathy, not specified as acute or chronic, with lesion of renal cortical necrosis                                                 |
| 5837   | Nephritis and nephropathy, not specified as acute or chronic, with lesion of renal medullary necrosis                                                |
| 585.x  | Chronic kidney disease                                                                                                                               |
| 586    | Renal failure, unspecified                                                                                                                           |
| 5880   | Renal osteodystrophy                                                                                                                                 |
| 7925   | Cloudy (hemodialysis) (peritoneal) dialysis effluent                                                                                                 |
| 99681  | Complications of transplanted kidney                                                                                                                 |

|        |                                                                      |
|--------|----------------------------------------------------------------------|
| 99673  | Other complications due to renal dialysis device, implant, and graft |
| 99656  | Mechanical complication due to peritoneal dialysis catheter          |
| V42.0  | Kidney replaced by transplant                                        |
| V45.1x | Renal dialysis status                                                |
| V56.xx | Encounter for extracorporeal dialysis                                |

### Cancer

|        |                                                                                    |
|--------|------------------------------------------------------------------------------------|
| 140.xx | Malignant neoplasm of lip                                                          |
| 141.xx | Malignant neoplasm of tongue                                                       |
| 142.xx | Malignant neoplasm of salivary gland                                               |
| 143.xx | Malignant neoplasm of gum                                                          |
| 144.xx | Malignant neoplasm of floor of mouth                                               |
| 145.xx | Malignant neoplasm of mouth                                                        |
| 146.xx | Malignant neoplasm of oropharynx                                                   |
| 147.xx | Malignant neoplasm of nasopharynx                                                  |
| 148.xx | Malignant neoplasm of hypopharynx                                                  |
| 149.xx | Malignant neoplasm of ill-defined sites within the lip and oral cavity             |
| 150.xx | Malignant neoplasm of esophagus                                                    |
| 151.xx | Malignant neoplasm of stomach                                                      |
| 152.xx | Malignant neoplasm of small intestine                                              |
| 153.xx | Malignant neoplasm of colon                                                        |
| 154.xx | Malignant neoplasm of rectum, rectosigmoid junction, and anus                      |
| 155.xx | Malignant neoplasm of liver and intrahepatic bile ducts                            |
| 156.xx | Malignant neoplasm of biliary tract                                                |
| 157.xx | Malignant neoplasm of pancreas                                                     |
| 158.xx | Malignant neoplasm of peritoneum                                                   |
| 159.xx | Malignant neoplasm of ill-defined sites within the digestive organs and peritoneum |
| 160.xx | Malignant neoplasm of accessory sinus                                              |
| 161.xx | Malignant neoplasm of larynx                                                       |
| 162.xx | Malignant neoplasm of bronchus and lung                                            |
| 163.xx | Malignant neoplasm of pleura                                                       |
| 164.xx | Malignant neoplasm of mediastinum                                                  |
| 165.xx | Malignant neoplasm of ill-defined sites within the respiratory system              |
| 170.xx | Malignant neoplasm of bone and articular cartilage                                 |
| 171.xx | Malignant neoplasm of connective and other soft tissue,                            |
| 172.xx | Melanoma of skin                                                                   |
| 173.xx | Malignant neoplasm of skin                                                         |
| 174.xx | Malignant neoplasm of breast (female)                                              |
| 175.xx | Malignant neoplasm of male breast                                                  |
| 176.xx | Kaposi's sarcoma                                                                   |
| 179.xx | Malignant neoplasm of uterus                                                       |
| 180.xx | Malignant neoplasm of cervix uteri                                                 |
| 181.xx | Malignant neoplasm of placenta                                                     |
| 182.xx | Malignant neoplasm of corpus uteri                                                 |

|        |                                                                  |
|--------|------------------------------------------------------------------|
| 183.xx | Malignant neoplasm of uterine adnexa                             |
| 184.xx | Malignant neoplasm of female genital organ                       |
| 185.xx | Malignant neoplasm of prostate                                   |
| 186.xx | Malignant neoplasm of testis                                     |
| 187.xx | Malignant neoplasm of male genital organ,                        |
| 188.xx | Malignant neoplasm of bladder                                    |
| 189.xx | Malignant neoplasm of urinary organ                              |
| 190.xx | Malignant neoplasm of eye                                        |
| 191.xx | Malignant neoplasm of brain                                      |
| 192.xx | Malignant neoplasm of nervous system                             |
| 193.xx | Malignant neoplasm of thyroid gland                              |
| 194.xx | Malignant neoplasm of endocrine gland                            |
| 195.xx | Malignant neoplasm of other specified sites                      |
| 196.xx | Secondary and unspecified malignant neoplasm of lymph nodes      |
| 197.xx | Secondary malignant neoplasm of respiratory and digestive organs |
| 198.xx | Secondary malignant neoplasm of other specified sites            |
| 199.xx | Other malignant neoplasm without specification of site           |
| 200.xx | Lymphosarcoma and Reticulosarcoma                                |
| 201.xx | Hodgkin's disease                                                |
| 202.xx | Nodular lymphoma                                                 |
| 203.xx | Multiple myeloma                                                 |
| 204.xx | Lymphoid leukemia                                                |
| 205.xx | Myeloid leukemia,                                                |
| 206.xx | Monocytic leukemia                                               |
| 207.xx | Other leukemia                                                   |
| 208.xx | Acute leukemia of unspecified cell type                          |
| 209.0x | Malignant carcinoid tumor of the small intestine,                |
| 209.1x | Malignant carcinoid tumor of the large intestine                 |
| 209.2x | Malignant carcinoid tumor of unknown primary site                |
| 209.3x | Malignant poorly differentiated neuroendocrine carcinoma         |
| 209.7x | Secondary neuroendocrine tumor                                   |
| 230.xx | Carcinoma in situ of digestive organs                            |
| 231.xx | Carcinoma in situ of respiratory system                          |
| 232.xx | Carcinoma in situ of skin                                        |
| 233.xx | Carcinoma in situ of urinary organs                              |
| 234.xx | Carcinoma in situ, site unspecified                              |

### Stroke

|        |                                                                                 |
|--------|---------------------------------------------------------------------------------|
| 094.87 | Persistent migraine aura with cerebral infarction                               |
| 346.6x | Subarachnoid hemorrhage                                                         |
| 430    | Intracerebral hemorrhage                                                        |
| 431    | Nontraumatic extradural hemorrhage                                              |
| 432.x  | Occlusion and stenosis of basilar artery without mention of cerebral infarction |
| 433.xx | Cerebral thrombosis without mention of cerebral infarction                      |

|        |                                                     |
|--------|-----------------------------------------------------|
| 434.xx | Acute, but ill-defined, cerebrovascular disease     |
| 436    | Other cerebrovascular disease                       |
| 437    | Cerebral atherosclerosis                            |
| 4370   | Other generalized ischemic cerebrovascular disease  |
| 4371   | Other ill-defined cerebrovascular disease           |
| 4378   | Unspecified cerebrovascular disease                 |
| 4379   | late effects of cerebrovascular disease             |
| 438.xx | Aphasia                                             |
| 7843   | Iatrogenic cerebrovascular infarction or hemorrhage |
| 99702  | Persistent migraine aura with cerebral infarction   |

### **Dementia**

|        |                                             |
|--------|---------------------------------------------|
| 290.xx | Senile psychotic condition                  |
| 294.1x | Dementia in conditions classified elsewhere |
| 331.0  | Alzheimer's disease                         |
| 331.1x | Frontotemporal dementia                     |
| 3312   | Senile degeneration of brain                |

### **Cirrhosis**

|       |                                               |
|-------|-----------------------------------------------|
| 571.2 | Alcoholic cirrhosis of liver                  |
| 571.5 | Cirrhosis of liver without mention of alcohol |
